# Supplementary material for: Nucleotide variation and balancing selection at the Ckma gene in Atlantic cod: analysis with multiple merger coalescent models
Source: PubMed Central journal article supplement (PMC4349156; doi:10.7717/peerj.786), 2015-02-24
Supplement: peerj-03-786-s023.pdf [file peerj-03-786-s023.pdf]

**Table S10.** The  $\ell_2$  distance and approximate log Likelihood (Eldon et al., 2015) between the observed site frequency spectra and expectation according to the algebraic ( $\mathbf{A}, \gamma$ ) and exponential ( $\mathbf{E}, \beta$ ) growth models (Eldon et al., 2015) for the three genes, *Ckma*, *HbA2*, and *Myg*.

| Locus       | $\mathbf{A}, \gamma$ |          | $\mathbf{E}, \beta$ |          |
|-------------|----------------------|----------|---------------------|----------|
|             | $\ell_2$             | $\log L$ | $\ell_2$            | $\log L$ |
| <i>Ckma</i> | 10.09                | 154.11   | 9.32                | 165.83   |
| <i>HbA2</i> | 6.95                 | 11.21    | 6.87                | 10.16    |
| <i>Myg</i>  | 2.43                 | 51.98    | 2.83                | 50.44    |
