# Supplementary material for: Nucleotide variation and balancing selection at the Ckma gene in Atlantic cod: analysis with multiple merger coalescent models
Source: PeerJ journal article supplement (doi:10.7717/peerj.786), 2015-02-24
Supplement: Supplemental_Table_S1.pdf [file Supplemental_Table_S1.pdf]

**Table S1.** Primer sequences for amplification and sequencing fragments of *Ckma* gene from Atlantic cod and closely related taxa.

| Primer name  | Use           | Sequence                                     |
|--------------|---------------|----------------------------------------------|
| creL8945     | Amplification | 5'-GTT TAG GAA TCT ACG CCC ATC CAG AGA CA-3' |
| creR12945    | Amplification | 5'-TGG CTA TCA TGC ATT CCC AAT GTT C-3'      |
| creseqR12388 | Sequencing    | 5'-CAT GAC CGT TGG CTG CGT TG-3'             |
| creseqL10486 | Sequencing    | 5'-TCG AAC ACT CCA CCG ACG GA-3'             |
| creseqR10602 | Sequencing    | 5'-ACA GAT TTC GTC TGC CGA GT-3'             |
