# Supplementary material for: Nucleotide variation and balancing selection at the Ckma gene in Atlantic cod: analysis with multiple merger coalescent models
Source: PeerJ journal article supplement (doi:10.7717/peerj.786), 2015-02-24
Supplement: Supplemental_Table_S5.pdf [file Supplemental_Table_S5.pdf]

**Table S5.** Maximum likelihood analysis of a Kingman-coalescent HKA test of neutrality and selection at three genes in Atlantic cod.

| Description              | $\ln L$ | $T$  | Test | $df$ | <i>Hb<math>\alpha</math>2</i> |     | <i>Myg</i> |     | <i>Ckma</i> |      |
|--------------------------|---------|------|------|------|-------------------------------|-----|------------|-----|-------------|------|
|                          |         |      |      |      | $\theta$                      | $k$ | $\theta$   | $k$ | $\theta$    | $k$  |
| Neutral, all $k = 1$     | -18.66  | 2.46 |      |      | 0.0035                        | 1   | 0.0068     | 1   | 0.0056      | 1    |
| Selection at <i>Ckma</i> | -17.47  | 3.86 | 2.38 | 1    | 0.0029                        | 1   | 0.0054     | 1   | 0.0032      | 2.12 |

Test is twice the  $\ln L$  difference of the two models, neutrality and selection at *Ckma*. Three loci are under test: Hemoglobin  $\alpha$  2 (*Hb $\alpha$ 2*), Myoglobin (*Myg*), and Creatine Kinase Muscle (*Ckma*).  $\theta$  is the scaled effective population size and the parameter  $k$  measures changes in diversity due to selection. Based on method of Wright and Charlesworth (2004).
