# Supplementary material for: Nucleotide variation and balancing selection at the Ckma gene in Atlantic cod: analysis with multiple merger coalescent models
Source: PeerJ journal article supplement (doi:10.7717/peerj.786), 2015-02-24
Supplement: Supplemental_Table_S8.pdf [file Supplemental_Table_S8.pdf]

**Table S8.** Likelihood ratio test statistics  $G$  for observed site frequency spectra of *Ckma* and expectation according to different coalescent models.

| Model                            | $G$    | Comparison | $2\Delta G$ | $df$ |
|----------------------------------|--------|------------|-------------|------|
| I. Kingman                       | 149.26 |            |             |      |
| II. Beta( $2 - \alpha, \alpha$ ) | 116.21 | I vs II    | 66.10       | 1    |
| III. point-mass                  | 114.42 | I vs III   | 69.69       | 1    |
