# Supplementary material for: Nucleotide variation and balancing selection at the Ckma gene in Atlantic cod: analysis with multiple merger coalescent models
Source: PeerJ journal article supplement (doi:10.7717/peerj.786), 2015-02-24
Supplement: Supplemental_Table_S9.pdf [file Supplemental_Table_S9.pdf]

**Table S9.** The  $\ell_2$  distance (Birkner et al., 2013b) between the observed site frequency spectra and expectation according to the Beta( $2 - \alpha, \alpha$ ) and point-mass multiple merger coalescent models for the three genes, *Ckma*, *HbA2*, and *Myg*.

| Locus       | Beta( $2 - \alpha, \alpha$ ) | Point-mass |
|-------------|------------------------------|------------|
| <i>Ckma</i> | 7.46                         | 8.16       |
| <i>HbA2</i> | 2.05                         | 1.40       |
| <i>Myg</i>  | 2.83                         | 3.92       |
